# Supplementary material
Source: publisher figshare collection journal article supplement (https://sage.figshare.com/ndownloader/files/23804898)

### **Figure S1: Gating of slanDC**

Monocytes were characterized by staining positive for CD45 and CD86. These cells were divided according the expression of CD14 and CD16 into three monocyte subsets (CD14<sup>++</sup>CD16<sup>-</sup>, Mo1; CD14<sup>++</sup>CD16<sup>+</sup>, Mo2; CD14<sup>+</sup>CD16<sup>++</sup>, Mo3). slanDC-positive cells are within the CD14<sup>+</sup>CD16<sup>++</sup> (Mo3) gate. Positivity of slanDC is determined due to isotype control staining.

Fig. S1:

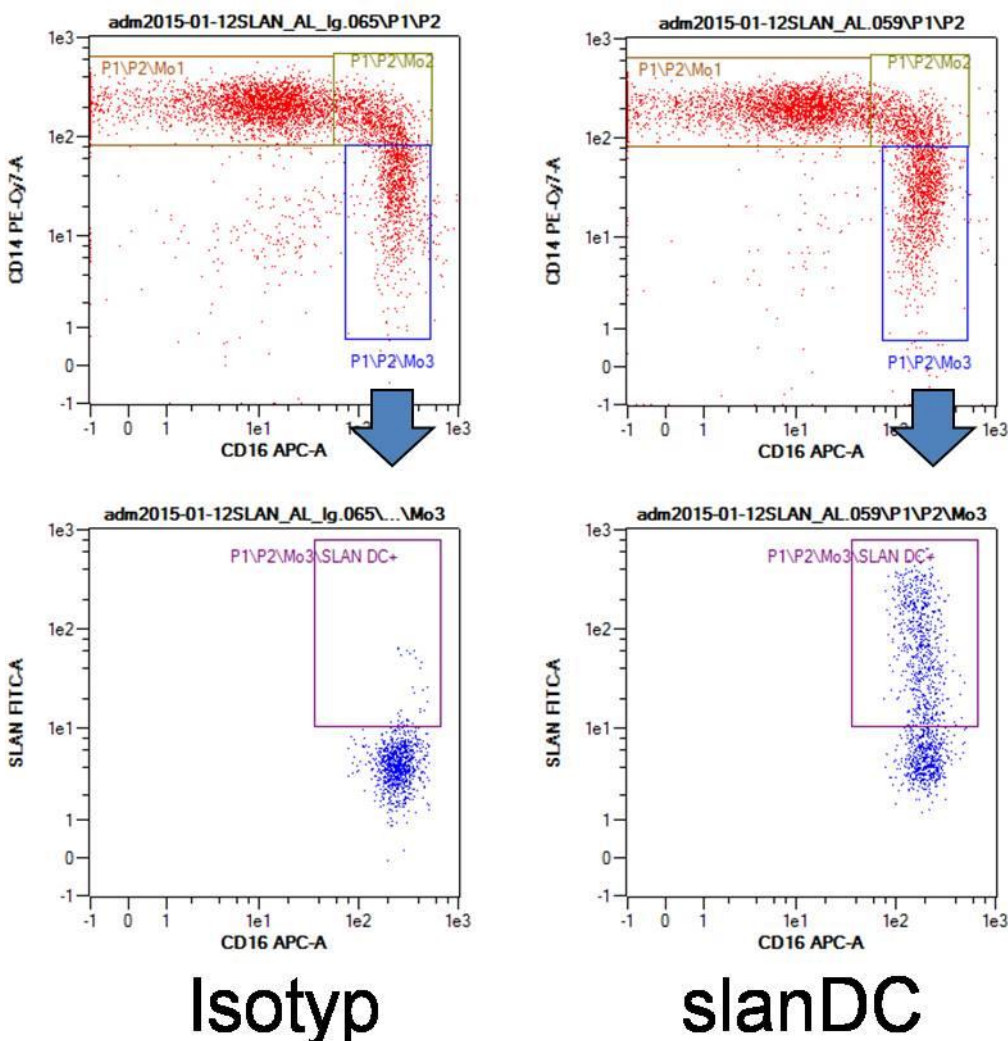

### **Figure S2: slanDC in HD patients and healthy controls**

Monocytes were characterized by staining positive for CD45 and CD86.. slanDC-positive cells were related to the pan-monocyte marker CD86. HD patients (N=19) expressed twice as much slanDC compared to healthy controls.

Figure S1

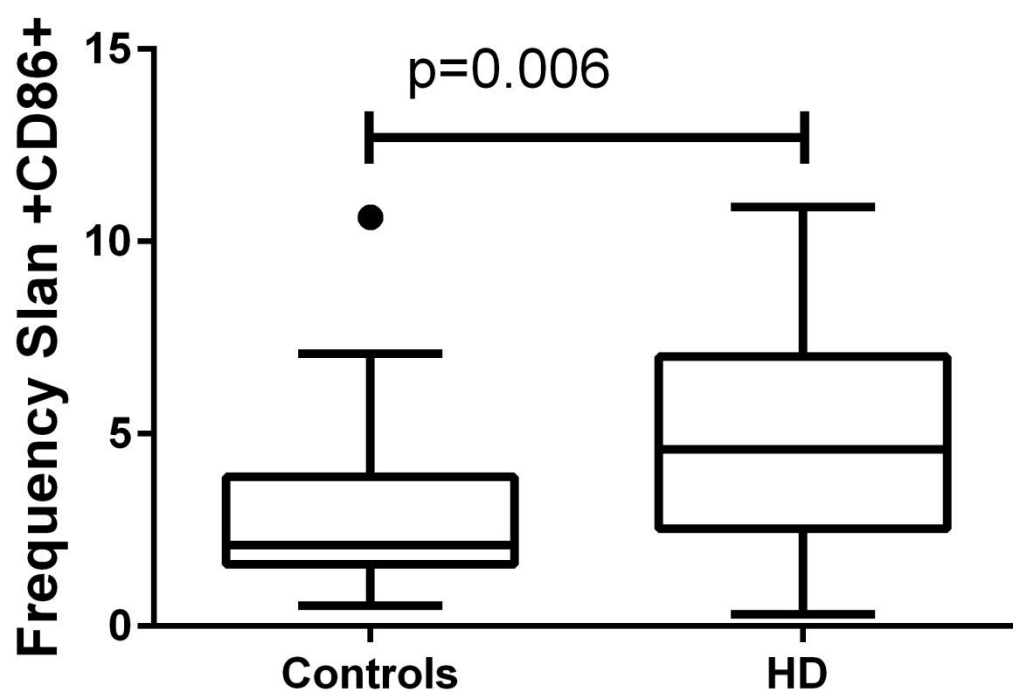

Supplement: Supplementary file 1 [file 23804898]
